# Supplementary figures and images for: Organic derivatives of the layered perovskite HLaNb2O7·xH2O with polyether chains on the interlayer surface: characterization, intercalation of LiClO4, and ionic conductivity
Source: Royal Society of Chemistry journal article supplement (doi:10.1039/b802003e), 2008-01-01

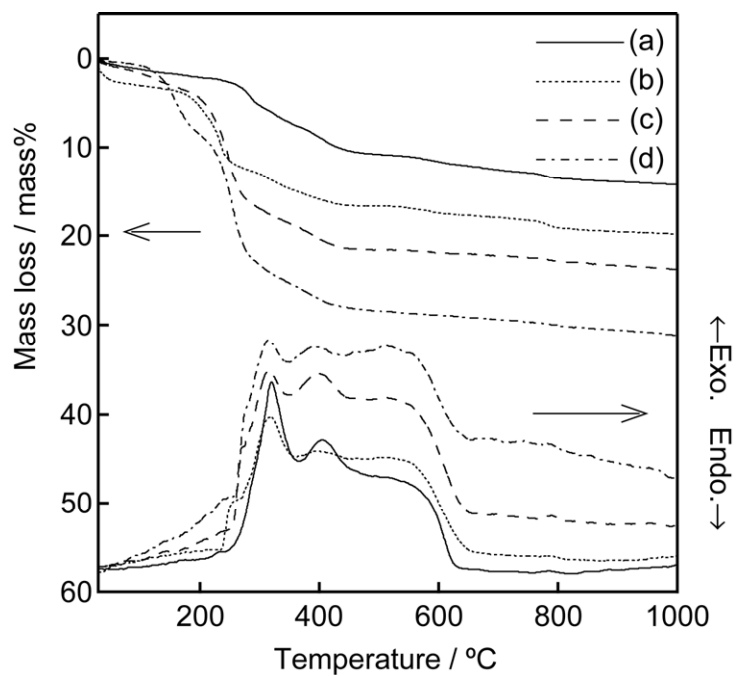

TG-DTA curves of (a) 1EO/decoxy-HLaNb, (b) 2EO/decoxy-HLaNb, (c) 3EO/decoxy-HLaNb, (d) 4EO/decoxy-HLaNb

Supplement: b802003e.pdf [file b802003e.pdf]
